# Supplementary material for: Hierarchical PS/PANI nanostructure supported Cu(ii) complexes: facile synthesis and study of catalytic applications in aerobic oxidation
Source: Royal Society of Chemistry journal article supplement (doi:10.1039/c4ra06944g), 2014-10-07
Supplement: c4ra06944g1.pdf [file c4ra06944g1.pdf]

**Hierarchical PS/PANI supported Cu(II) nanocatalysts: Facile synthesis and study of its catalytic application in aerobic oxidation**

Jie Yu <sup>a</sup>, Yi Luan <sup>a</sup>, Yue Qi <sup>a</sup>, Junying Hou <sup>a</sup>, Wenjun Dong <sup>b</sup>, Mu Yang <sup>a</sup>, Ge Wang <sup>a</sup>

<sup>a</sup>. *School of Materials Science and Engineering, University of Science and Technology Beijing, Beijing 100083, P. R. China Fax: +86 10 62327878; Tel: +86 10 62333765; E-mail: gewang@mater.ustb.edu.cn*

<sup>b</sup>. *Center for Optoelectronics Materials and Devices, Zhejiang Sci-Tech University, Hangzhou 310018, P. R. China*

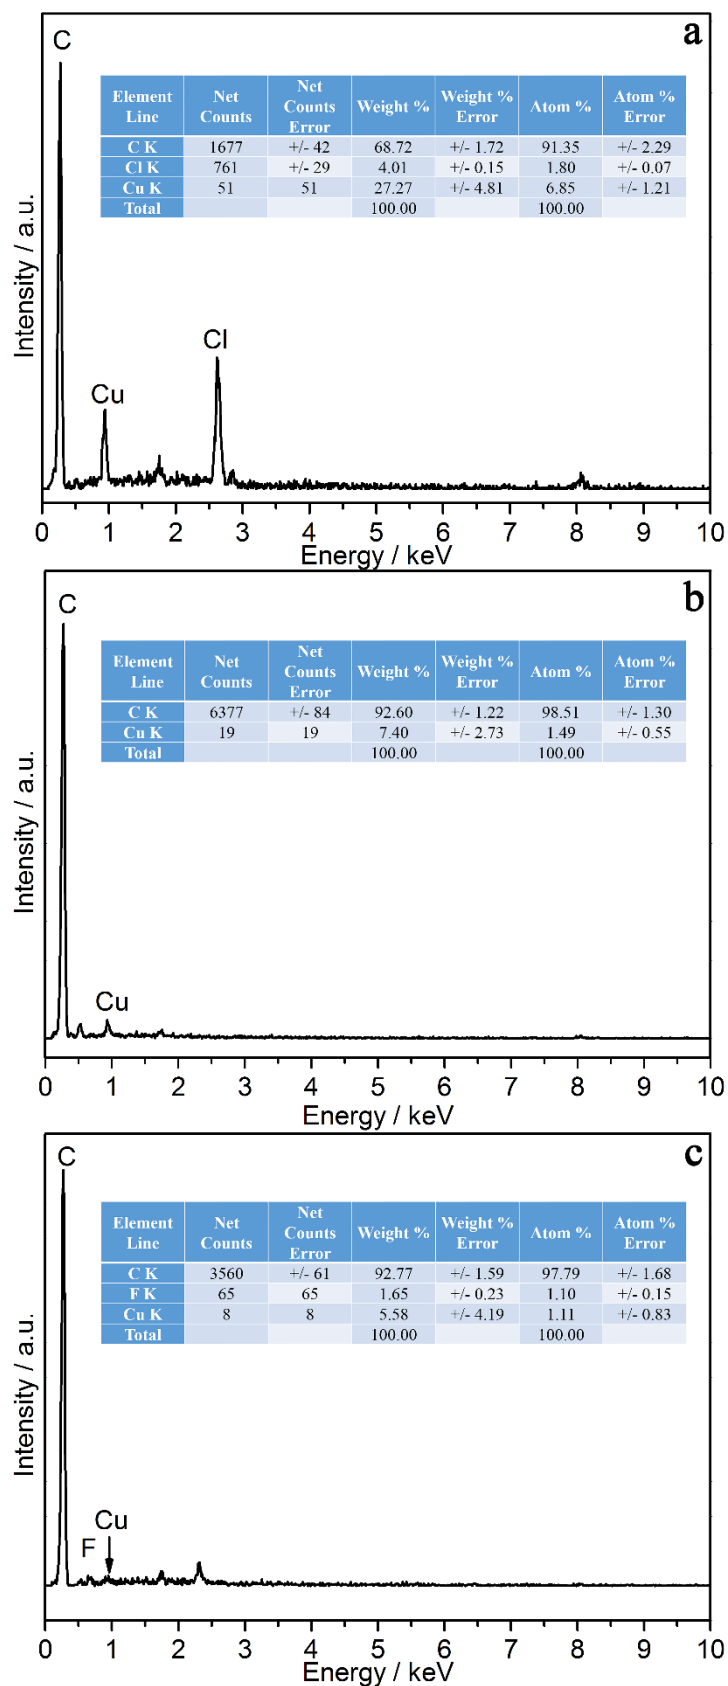

**Figure S1** EDX spectrum of the supported Cu catalysts: a) PS/PANI@CuCl<sub>2</sub>, b) PS/PANI@Cu(NO<sub>3</sub>)<sub>2</sub> and c) PS/PANI@Cu(CF<sub>3</sub>SO<sub>3</sub>)<sub>2</sub>.

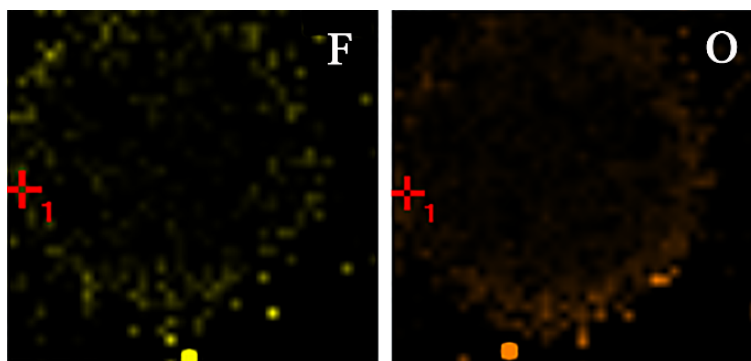

**Figure S2.** EDX elemental maps of F and O in PS/PANI@Cu(CF<sub>3</sub>SO<sub>3</sub>)<sub>2</sub> catalyst.

### General procedure for aerobic oxidation of benzyl alcohol using supported Cu (II) catalysts

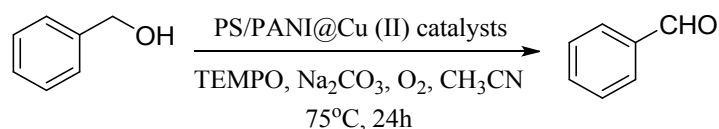

Benzyl alcohol (1 mmol) and supported Cu (II) catalyst (based on 1 mol% Cu, 0.01 mmol, 12.1 mg of PS/PANI@CuCl<sub>2</sub> in Table 1 Entry 3, 35.4 mg of PS/PANI@Cu(NO<sub>3</sub>)<sub>2</sub> in Table 1 Entry 4 and 41.1 mg of PS/PANI@Cu(OSO<sub>2</sub>CF<sub>3</sub>)<sub>2</sub> in Table 1 Entry 5) were added to acetonitrile (5 mL) with TEMPO (0.5 equiv.) and Na<sub>2</sub>CO<sub>3</sub> (1 equiv.) in a 25 mL round-bottom flask. The reaction mixture was purged three times with oxygen stirred at 75 °C under 1 atm of O<sub>2</sub>. After 24h, the solution was cooled to room temperature and the PS/PANI supported Cu (II) catalysts were filtered from the solution by centrifugation. The filtered liquid samples were analyzed by GC-MS with nitrobenzene as an internal standard.

### General procedure for aerobic epoxidation of cis-cyclooctene using PS/PANI@Cu(OSO<sub>2</sub>CF<sub>3</sub>)<sub>2</sub> catalyst

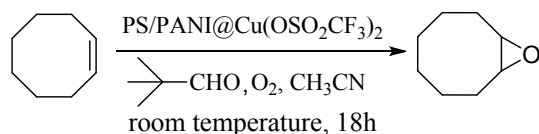

Cis-cyclooctene (1 mmol) and PS/PANI@Cu(OSO<sub>2</sub>CF<sub>3</sub>)<sub>2</sub> catalyst (based on 0.2 mol% Cu, 0.002 mmol, 8.2 mg of PS/PANI@Cu(OSO<sub>2</sub>CF<sub>3</sub>)<sub>2</sub> in Table 3) were added to acetonitrile (5 mL) with trimethylacetaldehyde (2 equiv.) in a 25 mL round-bottom flask. The reaction mixture was purged three times with oxygen stirred at room temperature under 1 atm of O<sub>2</sub>. After the reaction, the PS/PANI@Cu(OSO<sub>2</sub>CF<sub>3</sub>)<sub>2</sub> catalysts were filtered from the solution by centrifugation. The filtered liquid samples were analyzed by GC-MS with nitrobenzene as an internal standard.

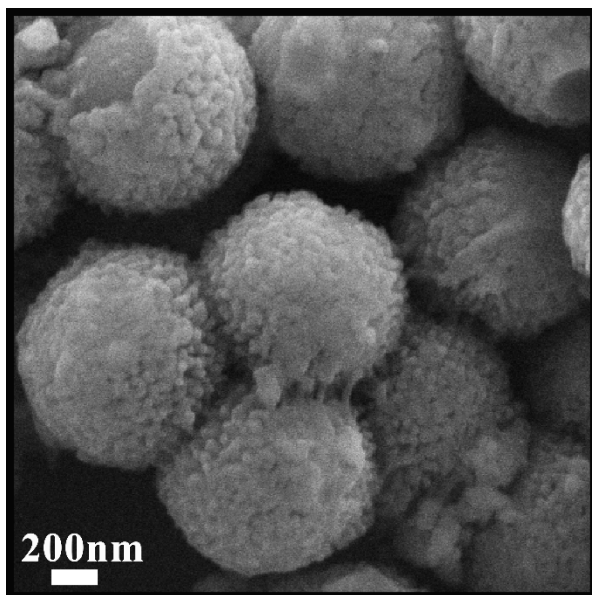

**Figure S3** SEM images of PS/PANI@Cu(OSO<sub>2</sub>CF<sub>3</sub>)<sub>2</sub> catalyst after six cycles.

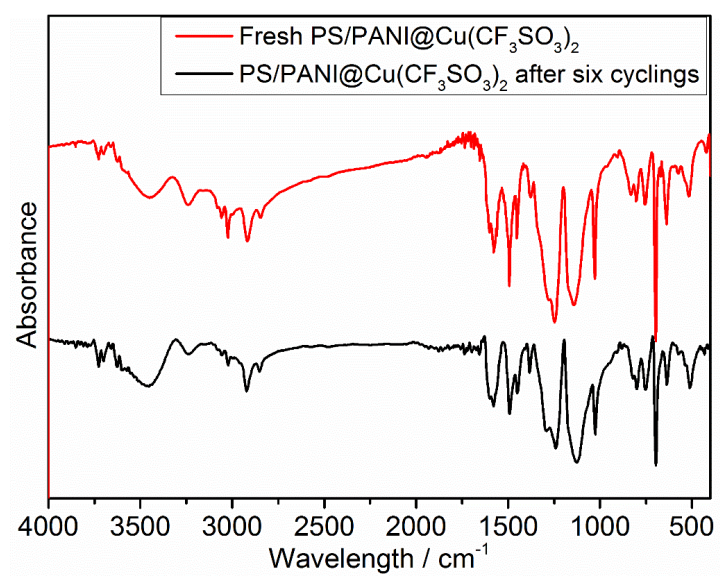

**Figure S4** FTIR spectra of PS/PANI@Cu(CF<sub>3</sub>SO<sub>3</sub>)<sub>2</sub> (red, top) and PS/PANI@Cu(CF<sub>3</sub>SO<sub>3</sub>)<sub>2</sub> after six cyclings (black, bottom).

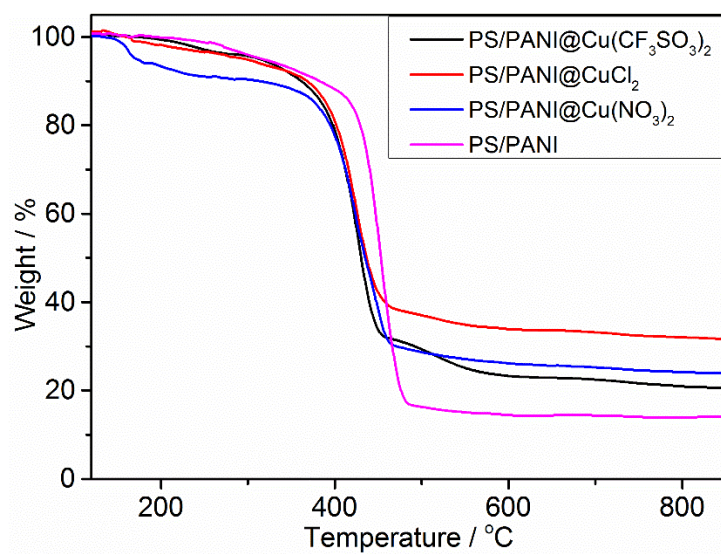

**Figure S5.** TG spectra of PS/PANI (Pink), PS/PANI@CuCl<sub>2</sub> (Red), PS/PANI@Cu(NO<sub>3</sub>)<sub>2</sub> (Blue) and PS/PANI@Cu(CF<sub>3</sub>SO<sub>3</sub>)<sub>2</sub> (Black).
